# Supplementary material for: Footprint of the host restriction factors APOBEC3 on the genome of human viruses
Source: PLOS journal article supplement (doi:10.1371/journal.ppat.1008718), 2020-08-14

Supplementary  
Figure 4

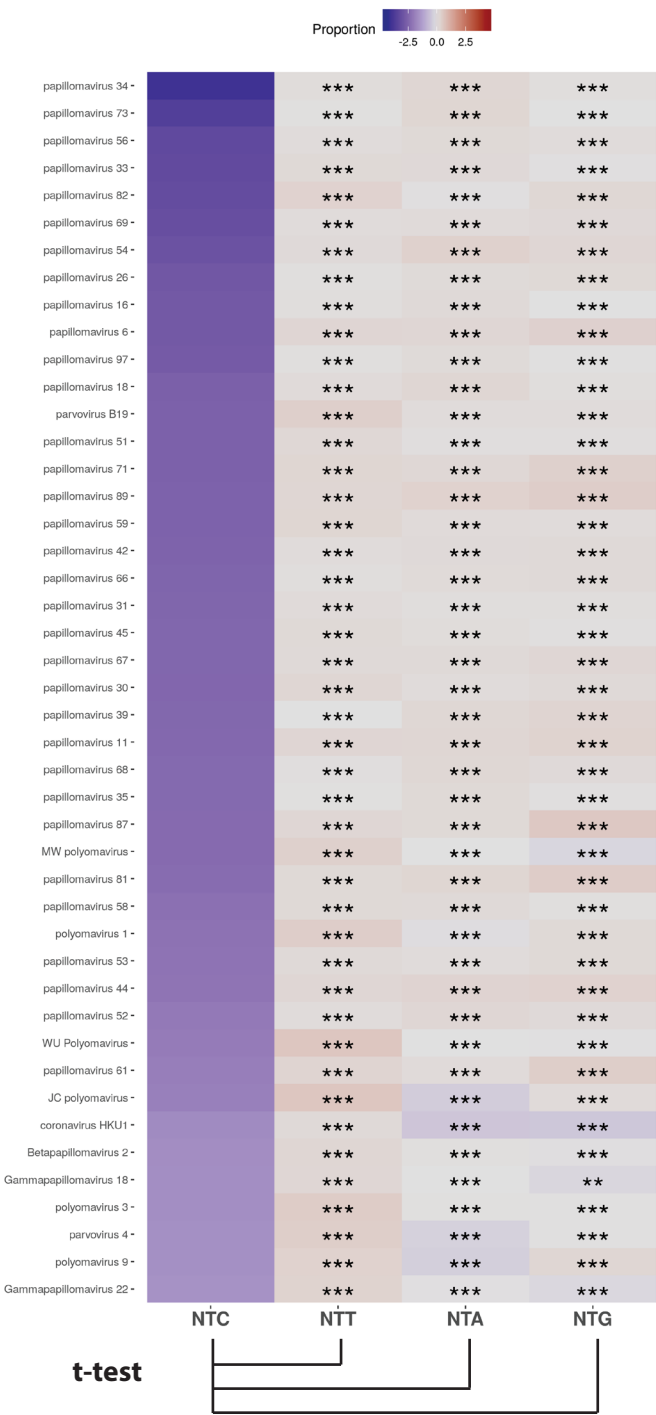

Supplement: S4 (10.1371/journal.ppat.1008718.s004) [file journal.ppat.1008718.s004]
